# Supplementary material for: Non-coding RNA LEVER sequestration of PRC2 can mediate long range gene regulation
Source: PubMed Central journal article supplement (PMC9001699; doi:10.1038/s42003-022-03250-x), 2022-04-11
Supplement: 42003_2022_3250_MOESM3_ESM.pdf [file 42003_2022_3250_MOESM3_ESM.pdf]

## Description of Additional Supplementary Files

**File name: Supplementary data 1**

**Description:** Plasmids, primers, and sgRNA sequences used in this study

**File name: Supplementary data 2**

**Description:** Source data of main figures.
